# Supplementary material
Source: publisher figshare collection journal article supplement (https://gsapubs.figshare.com/ndownloader/files/22408611)
Supplement: Supplementary file 1 [file 22408611]

Jones, C.H., Reeg, H., Zandt, G., Gilbert, H., Owens, T.J., and Stachnik, J., 2014, P-wave tomography of potential convective downwellings and their source regions, Sierra Nevada, California: Geosphere, v. 10, doi:10.1130/GES00961.1.

Supplemental Table 2. Station locations for seismometers that were not contained within the SNEP network. USArray Transportable Network (TA), Berkeley (BK), Cal Tech (CI & TS), University of Nevada, Reno (NN), University of Washington (UW), University of Oregon (UO), US National Seismic Network (US), Leo Brady Network (LB).

| **Station** | **Latitude (deg)** | **Longitude (deg)** | **Elevation (m)** | **Network** |
| --- | --- | --- | --- | --- |
| ADO | 34.5505 | -117.4339 | 908 | CI |
| ARV | 35.1269 | -118.8301 | 258 | CI |
| BAK | 35.3444 | -119.1044 | 116 | CI |
| BBR | 34.2623 | -116.9208 | 2069 | CI |
| BDM | 37.954 | -121.8655 | 220 | BK |
| BEK | 39.8667 | -120.3586 | 1743 | NN |
| BFS | 34.2388 | -117.6585 | 1312 | CI |
| BKS | 37.8762 | -122.2356 | 244 | BK |
| BMN | 40.4314 | -117.221 | 1594 | LB/US |
| BNLO | 37.1311 | -122.1729 | 794 | TA |
| BRIB | 37.9189 | -122.1517 | 113 | BK |
| BRK | 37.8735 | -122.261 | 49 | BK |
| CHF | 34.3334 | -118.0258 | 1594 | CI |
| CIA | 33.4019 | -118.4137 | 467 | CI |
| CMB | 38.0345 | -120.3865 | 697 | BK |
| CVS | 38.3453 | -122.4584 | 295 | BK |
| CWC | 36.4399 | -118.0802 | 1595 | CI/TS |
| DBO | 43.119 | -123.2439 | 984 | UO |
| DEC | 34.2535 | -118.3338 | 519 | CI |
| DJJ | 34.1062 | -118.455 | 268 | CI |
| EDW2 | 34.8811 | -117.9939 | 772 | CI |
| ELFS | 40.6183 | -120.7279 | 1553 | BK |
| FARB | 37.6978 | -123.0011 | -18 | BK |
| FMP | 33.7126 | -118.2938 | 89 | CI |
| FUR | 36.4669 | -116.8632 | -36 | CI |
| GASB | 39.6547 | -122.716 | 1355 | BK |
| GRA | 36.9961 | -117.3662 | 689 | CI |
| GSC | 35.3018 | -116.8057 | 1000 | CI/TS |
| HAST | 36.3887 | -121.5514 | 542 | BK/TA |
| HATC | 40.8161 | -121.4612 | 1013 | BK/TA |
| HEC | 34.8294 | -116.335 | 920 | CI |
| HELL | 36.6801 | -119.0228 | 1145 | BK/TA |
| HOPS | 38.9935 | -123.0723 | 299 | BK |
| HUMO | 42.6071 | -122.9567 | 555 | BK |
| I03A | 43.9726 | -123.2777 | 206 | TA |
| I04A | 43.7941 | -122.4113 | 731 | TA |
| ISA | 35.6628 | -118.474 | 873 | CI/TS/US |
| J02A | 43.3654 | -123.5747 | 136 | TA |
| J03A | 43.3717 | -122.9646 | 292 | TA |
| J04A | 43.2406 | -122.1093 | 1952 | TA |
| J05A | 43.2843 | -121.2357 | 1540 | TA |
| JCC | 40.8175 | -124.0295 | 27 | BK |
| JRSC | 37.4037 | -122.2387 | 70 | BK |
| K01A | 42.8088 | -124.4692 | 175 | TA |
| K02A | 42.7667 | -123.4898 | 963 | TA |
| K04A | 42.6133 | -121.7307 | 1305 | TA |
| K05A | 42.7258 | -120.8934 | 1887 | TA |
| KCC | 37.3236 | -119.3187 | 888 | BK |
| L02A | 42.156 | -123.6018 | 485 | TA |
| L04A | 42.175 | -121.891 | 1336 | TA |
| L05A | 42.0472 | -120.8336 | 1751 | TA |
| L07A | 42.0187 | -119.3398 | 1816 | TA |
| LAVA | 38.7552 | -120.7395 | 828 | TA |
| LGU | 34.1082 | -119.0659 | 416 | CI |
| LRL | 35.4795 | -117.6821 | 1340 | CI |
| M01C | 41.8473 | -124.1221 | 38 | TA |
| M02C | 41.392 | -122.8538 | 960 | TA |
| M03C | 41.2742 | -122.122 | 1047 | TA |
| M04C | 41.7826 | -121.8393 | 1391 | TA |
| M05C | 41.3593 | -121.1457 | 1333 | TA |
| M06C | 41.2047 | -120.4772 | 1434 | TA |
| M07A | 41.3884 | -119.1711 | 1400 | TA |
| MCCM | 38.1448 | -122.8802 | -8 | BK |
| MHC | 37.3416 | -121.6426 | 1250 | BK |
| MLAC | 37.6302 | -118.8361 | 2162 | CI/TS |
| MNRC | 38.8787 | -122.4428 | 710 | BK |
| MNV | 38.4328 | -118.1531 | 1524 | US |
| MOD | 41.9025 | -120.3029 | 1554 | BK |
| MPM | 36.058 | -117.489 | 1839 | CI |
| MPP | 34.8885 | -119.8136 | 1739 | CI |
| MWC | 34.2236 | -118.0583 | 1725 | CI |
| N02C | 40.822 | -123.3057 | 717 | TA |
| N06A | 40.7484 | -119.8346 | 1341 | TA |
| N07A | 40.7721 | -118.9716 | 1306 | TA |
| N07B | 40.7797 | -118.9711 | 1302 | TA |
| N08A | 40.7811 | -118.1337 | 1493 | TA |
| O01C | 40.1398 | -123.8195 | 138 | TA |
| O02C | 40.1767 | -122.7883 | 962 | TA |
| O03C | 39.9971 | -122.0319 | 85 | TA |
| O04C | 40.32 | -121.086 | 1513 | TA |
| O05C | 39.962 | -120.9176 | 1032 | TA |
| O06A | 40.165 | -119.8275 | 1229 | TA |
| O07A | 40.1614 | -118.8772 | 1203 | TA |
| O08A | 40.2903 | -118.155 | 2138 | TA |
| O09A | 40.1697 | -117.1899 | 1492 | TA |
| OMM | 37.6214 | -118.9994 | 2750 | NN |
| ORV | 39.5545 | -121.5004 | 335 | BK |
| OSI | 34.6145 | -118.7235 | 718 | CI/TS |
| P01C | 39.469 | -123.3375 | 441 | TA |
| P05C | 39.3028 | -120.6077 | 1756 | TA |
| P06A | 39.6785 | -119.8983 | 1369 | TA |
| P07A | 39.5399 | -118.8893 | 1219 | TA |
| P08A | 39.6946 | -118.08 | 1040 | TA |
| P09A | 39.5516 | -117.1395 | 1738 | TA |
| P10A | 39.6202 | -116.4639 | 1874 | TA |
| PACP | 37.008 | -121.287 | 844 | BK |
| PAS | 34.1484 | -118.1712 | 314 | CI/TS |
| PASC | 34.1714 | -118.1852 | 341 | CI |
| PHL | 35.4077 | -120.5456 | 355 | CI |
| PKD | 35.9452 | -120.5416 | 583 | BK |
| Q03C | 38.6333 | -122.0145 | 108 | TA |
| Q04C | 38.839 | -121.3769 | 14 | TA |
| Q07A | 38.9383 | -118.8078 | 1276 | TA |
| Q08A | 38.8606 | -117.9316 | 1412 | TA |
| Q09A | 38.834 | -117.1816 | 1704 | TA |
| Q10A | 38.8247 | -116.3999 | 2027 | TA |
| Q11A | 38.8455 | -115.6541 | 1562 | TA |
| R04C | 38.2571 | -120.9363 | 115 | TA |
| R05C | 38.7028 | -120.0755 | 2366 | TA |
| R06C | 38.5226 | -119.4509 | 1698 | TA |
| R07C | 38.089 | -119.0469 | 1996 | TA |
| R08A | 38.3489 | -118.1064 | 1420 | TA |
| R09A | 38.2397 | -117.0718 | 1759 | TA |
| R10A | 38.2886 | -116.3021 | 1600 | TA |
| R11A | 38.3489 | -115.5854 | 1756 | TA |
| RAMR | 35.636 | -120.8698 | 414 | BK |
| RCT | 36.3052 | -119.2438 | 107 | CI |
| RPV | 33.7435 | -118.4041 | 107 | TS |
| RRX | 34.8753 | -116.9968 | 439 | CI |
| RVR | 33.9935 | -117.3755 | 266 | CI |
| S04C | 37.5049 | -121.3278 | 310 | TA |
| S05C | 37.346 | -120.3296 | 85 | TA |
| S06C | 37.8817 | -119.8488 | 1377 | TA |
| S08C | 37.4993 | -118.1711 | 3087 | TA |
| S09A | 37.7243 | -117.2246 | 1768 | TA |
| S10A | 37.923 | -116.5948 | 1796 | TA |
| S11A | 37.6444 | -115.7472 | 1456 | TA |
| SAO | 36.764 | -121.4472 | 317 | BK |
| SBC | 34.4408 | -119.7149 | 94 | CI/TS |
| SCZ | 36.598 | -121.403 | 261 | CI/G |
| SCZ2 | 33.9954 | -119.6351 | 440 | CI |
| SDD | 33.5526 | -117.6617 | 120 | CI |
| SDP | 34.5655 | -120.5014 | 631 | CI |
| SHO | 35.8995 | -116.2753 | 451 | CI |
| SLA | 35.8909 | -117.2833 | 1174 | CI |
| SMM | 35.3142 | -119.9958 | 599 | CI |
| SNCC | 33.2480 | -119.5240 | 197 | CI |
| SUTB | 39.2291 | -121.7861 | 252 | BK/TA |
| SVD | 34.1065 | -117.0982 | 605 | CI/TS |
| T05C | 36.8953 | -120.6737 | 46 | TA |
| T06C | 37.0069 | -119.7089 | 216 | TA |
| T11A | 37.2408 | -115.2202 | 1402 | TA |
| TAKO | 43.7433 | -124.0825 | 46 | UW |
| TIN | 37.0542 | -118.2301 | 1197 | CI |
| TOV | 34.1561 | -118.8204 | 298 | CI |
| TPH | 38.075 | -117.2225 | 1883 | LB |
| TPNV | 36.9488 | -116.2495 | 1600 | US |
| TUQ | 35.4358 | -115.9239 | 1350 | CI |
| U04C | 36.3627 | -120.7828 | 813 | TA |
| U05C | 36.3356 | -120.1205 | 92 | TA |
| U10A | 36.4193 | -116.3297 | 668 | TA |
| U11A | 36.423 | -115.3835 | 867 | TA |
| USC | 34.0192 | -118.2863 | 58 | CI/TS |
| V03C | 36.0214 | -121.2356 | 336 | TA |
| V04C | 35.636 | -120.8699 | 431 | TA |
| V05C | 35.8667 | -119.9028 | 118 | TA |
| V11A | 35.8384 | -115.4305 | 1117 | TA |
| VCS | 34.4836 | -118.1178 | 991 | CI |
| VES | 35.8409 | -119.0847 | 154 | CI |
| VTV | 34.5606 | -117.3296 | 843 | CI/TS |
| WCN | 39.3017 | -119.7563 | 1704 | NN |
| WDC | 40.5799 | -122.5411 | 268 | BK/US |
| WENL | 37.6221 | -121.757 | 139 | BK |
| YBH | 41.7319 | -122.7104 | 1060 | BK |
